# Supplementary material
Source: Springer Nature journal article supplement (https://www.springermedizin.de/resource/supplementary/12885_2013_4055_MOESM1_ESM.pdf/9465108)

Observation points

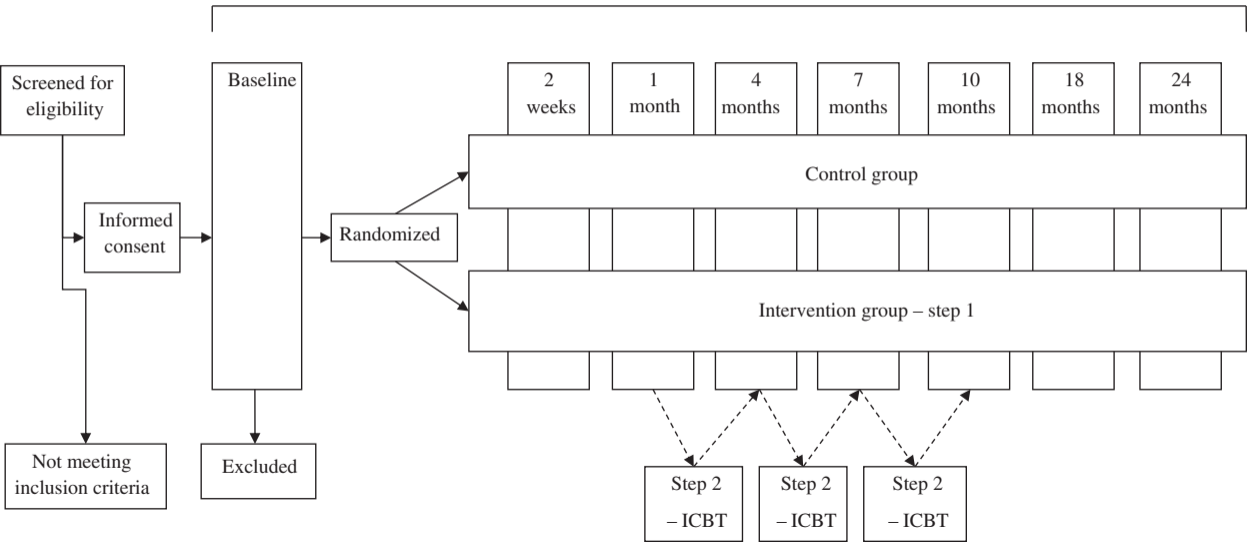

Supplement: MOESM1 [file 9465108]
